# Supplementary material for: Physical activity questionnaire for older children (PAQ-C): Arabic translation, cross-cultural adaptation, and psychometric validation in school-aged children in Saudi Arabia
Source: PeerJ. 2022 Apr 12;10:e13237. doi: 10.7717/peerj.13237 (PMC9012174; doi:10.7717/peerj.13237)
Supplement: Supplemental Information 1 [file peerj-10-13237-s001.xlsx]

## Sheet: Sheet1
S.No	Age	Age group	Gender	Grade	Height	weight	BMI	Han-Dom	P1_7 days	P2_PE	P3_recess	P4_Lunch	P5_Aft Sch	P6_Eveng	P7_Wk end	P8_Best	P9_Score	P10_Sick	PTot Scor	PSumm Score
1	10	2	1	6	143	59	28.8523	1	1.5	3	5	2	1	2	2	1	2.5	0	20	2.22222
2	12	3	1	6	136	46	24.8702	2	1	5	4	4	1	3	3	1	3.28125	0	25.2812	2.80903
3	14	3	1	6	140	47	23.9796	2	2.5	5	5	4	1	5	4	5	4.375	0	35.875	3.98611
4	13	3	1	6	143.5	43.5	21.1245	2	1	5	2	2	3	3	1	2	3.125	0	22.125	2.45833
5	12	3	1	6	154.5	78.4	32.8442	2	1.5	5	5	2	4	1	2	2	3.125	0	25.625	2.84722
6	12	3	1	6	146.5	59	27.4901	2	2.5	3	4	1	1	1	2	4	4.0625	0	22.5625	2.50694
7	12	3	1	6	144.5	37.9	18.1511	2	1	2	2	1	1	3	1	1	3.125	0	15.125	1.68056
8	12	3	1	6	146	36.3	17.0295	2	1.75	5	4	4	3	1	1	3	2.96875	0	25.7188	2.85764
9	12	3	1	6	143	62	30.3193	1	1.5	5	4	4	2	3	3	3	4.0625	0	29.5625	3.28472
10	11	2	1	6	149.5	45.2	20.2235	2	1	2	1	2	1	5	1	2	2.5	0	17.5	1.94444
11	12	3	1	6	141	32.4	16.297	2	1.5	5	5	5	1	1	4	2	3.59375	0	28.0938	3.12153
12	8	1	1	3	113	17.2	13.4701	2	1.75	2	2	1	3	1	3	2	3.125	0	18.875	2.09722
13	11	2	1	5	134.5	32	17.6891	2	1	5	4	4	2	1	3	2	2.8125	0	24.8125	2.75694
14	11	2	1	5	134	32.6	18.1555	2	1.5	5	5	1	1	3	2	2	3.59375	0	24.0938	2.67708
15	11	2	1	5	133	31.4	17.7511	2	1.5	5	1	1	4	3	2	3	4.375	0	24.875	2.76389
16	12	3	1	6	149	34	15.3146	2	1	5	1	1	1	1	1	1	1.875	0	13.875	1.54167
17	11	2	1	5	131	34.5	20.1037	2	2	5	4	4	3	1	4	4	3.4375	0	30.4375	3.38194
18	13	3	1	6	152.5	65	27.9495	1	2.5	4	5	5	1	3	2	2	4.53125	0	29.0312	3.22569
19	12	3	1	6	138.5	27.3	14.2319	2	1.5	5	1	1	3	2	2	1	2.34375	0	18.8438	2.09375
20	12	3	1	6	142.5	36.8	18.1225	2	1	2	3	1	1	3	3	3	2.8125	0	19.8125	2.20139
21	11	2	1	5	132.5	28	15.9487	2	1.5	4	4	3	1	1	3	2	2.96875	0	22.4688	2.49653
22	11	2	1	5	136	31.9	17.247	2	1.5	5	4	5	1	3	1	2	3.90625	0	26.4062	2.93403
23	12	3	1	5	137	40.1	21.365	2	1	5	3	3	1	1	2	2	2.34375	0	20.3438	2.26042
24	12	3	1	6	133.5	32.4	18.1795	2	1.5	5	5	1	1	1	3	3	3.59375	0	24.0938	2.67708
25	11	2	1	6	129	49.6	29.8059	2	1.5	3	1	1	1	1	3	1	2.65625	0	15.1562	1.68403
26	12	3	1	6	139	26.1	13.5086	1	2.5	5	1	1	4	3	4	3	4.84375	0	28.3438	3.14931
27	12	3	1	5	165	36	13.2231	2	1.75	5	1	1	2	1	1	1	3.59375	0	17.3438	1.92708
28	11	2	1	5	141.2	39.9	20.0126	2	2	5	1	1	4	3	3	2	3.59375	0	24.5938	2.73264
29	11	2	1	5	143	28.3	13.8393	2	2	3	3	1	1	3	3	2	4.21875	0	22.2188	2.46875
30	12	3	1	6	143	30.6	14.9641	2	1.25	3	4	2	5	3	2	2	3.90625	0	26.1562	2.90625
31	11	2	1	5	131.5	29.3	16.944	2	1.5	5	1	5	1	2	2	2	3.125	0	22.625	2.51389
32	11	2	1	5	135	29.7	16.2963	2	2.5	5	4	3	5	3	3	3	4.84375	0	33.3438	3.70486
33	12	3	1	6	145	50	23.7812	2	2	5	5	4	3	4	5	5	4.21875	0	37.2188	4.13542
34	12	3	1	5	130	36.3	21.4793	2	1.5	5	1	2	3	1	3	2	2.65625	0	21.1562	2.35069
35	12	3	1	5	128	48.9	29.8462	2	2	5	5	3	4	1	4	4	4.53125	0	32.5312	3.61458
36	13	3	1	6	134.5	46.2	25.5386	2	2.5	5	5	5	3	3	4	4	3.90625	0	35.4062	3.93403
37	12	3	1	6	131	33.6	19.5793	2	1.5	5	5	5	1	3	3	3	4.6875	0	31.1875	3.46528
38	10	2	1	5	147	43.5	20.1305	2	2	4	3	3	3	3	2	2	4.375	0	26.375	2.93056
39	10	2	1	5	144	43	20.7369	2	1	3	3	3	1	2	2	1	2.1875	0	18.1875	2.02083
40	10	2	1	4	141	27.8	13.9832	2	1.5	5	5	1	1	4	1	2	1.40625	0	21.9062	2.43403
41	10	2	1	4	131	24.3	14.16	2	1.75	5	5	4	3	3	4	3	2.96875	0	31.7188	3.52431
42	10	2	1	4	142	24.8	12.2991	2	1.5	4	1	1	1	2	3	2	1.40625	0	16.9062	1.87847
43	10	2	1	4	140	30	15.3061	2	1.5	5	4	5	4	3	4	3	2.96875	0	32.4688	3.60764
44	10	2	1	4	145	45.6	21.6885	2	1.75	5	2	1	3	2	4	2	3.28125	0	24.0312	2.67014
45	10	2	1	4	138	51.3	26.9376	2	2	5	4	5	4	4	3	3	4.0625	0	34.0625	3.78472
46	10	2	1	4	130	49	28.9941	2	1.75	4	4	1	2	1	2	2	3.75	0	21.5	2.38889
47	10	2	1	4	139	35	18.115	1	2	5	5	5	5	5	2	2	2.8125	0	33.8125	3.75694
48	10	2	1	4	135	40	21.9479	2	1.5	5	5	3	4	3	3	3	2.96875	0	30.4688	3.38542
49	10	2	1	4	124	26	16.9095	2	1.5	3	4	4	4	4	4	4	2.65625	0	31.1562	3.46181
50	10	2	1	4	138	32	16.8032	1	1	5	3	1	2	3	3	2	2.8125	0	22.8125	2.53472
51	12	3	1	6	143	37.7	18.4361	2	2	5	3	1	3	3	3	3	1.60714	0	24.6071	2.73413
52	12	3	1	6	140	75.4	38.4694	2	1	3	1	3	1	1	2	2	3.90625	0	17.9062	1.98958
53	12	3	1	6	151	53.1	23.2885	2	1	2	1	1	1	1	1	2	2.96875	0	12.9688	1.44097
54	11	2	1	5	127	24.4	15.128	2	1.5	5	1	3	2	1	3	2	2.03125	0	20.5312	2.28125
55	12	3	1	6	138	40.2	21.109	2	1.5	3	3	2	2	1	2	3	2.5	0	20	2.22222
56	9	1	1	3	118	22.8	16.3746	2	2	5	1	1	2	1	1	3	3.28125	0	19.2812	2.14236
57	9	1	1	4	120	22.2	15.4167	2	1.5	5	3	1	3	3	3	3	3.28125	0	25.7812	2.86458
58	9	1	1	4	128	26.2	15.9912	2	1.5	5	4	2	3	2	3	1	2.03125	0	23.5312	2.61458
59	9	1	1	2	115	20.1	15.1985	2	1.5	5	1	2	3	2	3	2	3.28125	0	22.7812	2.53125
60	9	1	1	2	126	26.1	16.4399	2	2	5	2	3	3	1	2	1	2.34375	0	21.3438	2.37153
61	9	1	1	4	136	35	18.923	2	2	5	5	5	5	1	4	4	4.53125	0	35.5312	3.94792
62	9	1	1	4	118	23	16.5182	2	2	5	5	3	1	4	5	4	5	0	34	3.77778
63	9	1	1	4	131	27	15.7333	2	0.5	5	3	1	1	1	1	2	2.1875	0	16.6875	1.85417
64	9	1	1	4	129	24.7	14.8429	2	2	5	4	4	2	3	4	1	4.0625	0	29.0625	3.22917
65	9	1	1	4	143	29	14.1816	2	2	4	2	3	5	2	3	4	5	0	30	3.33333
66	9	1	1	4	133.5	30.5	17.1134	2	2	5	5	5	3	3	4	3	1.875	0	31.875	3.54167
67	12	3	1	6	127.5	26.6	16.3629	2	2.5	5	3	2	1	5	3	5	5.15625	0	31.6562	3.51736
68	12	3	1	6	147.5	38.4	17.6501	2	2	5	2	2	4	1	5	2	3.125	0	26.125	2.90278
69	12	3	1	6	139.5	57.1	29.3419	2	2	3	5	1	1	3	1	1	1.25	0	18.25	2.02778
70	12	3	1	6	126.5	61.8	38.6196	2	1.5	3	1	2	2	2	1	3	2.5	0	18	2
71	12	3	1	6	144	48.8	23.534	2	2.5	5	5	1	1	3	3	3	3.4375	0	26.9375	2.99306
72	12	3	1	6	144	42	20.2546	2	1.5	4	4	1	3	3	3	3	2.65625	0	25.1562	2.79514
73	12	3	1	5	133	30.2	17.0728	2	2.5	5	4	1	3	1	3	5	4.0625	0	28.5625	3.17361
74	12	3	1	6	136	32.4	17.5173	2	0.5	2	1	1	1	1	1	1	1.25	0	9.75	1.08333
75	12	3	1	5	141	35.5	17.8562	2	1	3	1	2	1	1	1	2	2.65625	0	14.6562	1.62847
76	12	3	1	5	140	68	34.6939	2	1	3	3	3	3	3	3	3	3.75	0	25.75	2.86111
77	12	3	1	5	133	37	20.917	2	1	5	3	3	3	3	3	3	4.58333	0	28.5833	3.17593
78	12	3	1	5	147	33	15.2714	2	1	5	2	2	2	2	3	3	3.4375	0	23.4375	2.60417
79	12	3	1	6	137	37.8	20.1396	2	2.5	5	1	2	3	2	3	2	3.4375	0	23.9375	2.65972
80	13	3	1	5	149	47	21.1702	2	1	5	3	1	2	2	2	2	2.96875	0	20.9688	2.32986
81	13	3	1	5	146	35.5	16.6542	2	2.5	5	5	1	5	5	5	4	5	0	37.5	4.16667
82	12	3	1	5	143	43	21.0279	2	1	2	1	3	2	2	2	1	1.25	0	15.25	1.69444
83	8	1	1	3	114	21.2	16.3127	2	1.5	5	1	1	2	3	3	2	2.65625	0	21.1562	2.35069
84	8	1	1	3	119.5	20.4	14.2855	2	2	5	3	1	3	2	3	4	2.8125	0	25.8125	2.86806
85	8	1	1	2	124.5	27.1	17.4836	2	2	5	5	1	3	1	1	2	3.90625	0	23.9062	2.65625
86	8	1	1	2	141	27.8	13.9832	2	1.5	5	3	1	3	1	4	3	3.4375	0	24.9375	2.77083
87	8	1	1	2	125	26.2	16.768	1	2.5	5	5	1	3	4	3	3	2.65625	0	29.1562	3.23958
88	11	2	1	5	131	42	24.4741	1	2	5	3	1	1	3	1	2	2.5	0	20.5	2.27778
89	11	2	1	5	138.5	32.5	16.9427	2	2	5	4	3	3	4	3	3	2.5	0	29.5	3.27778
90	11	2	1	5	140.5	41.7	21.1244	1	2.5	5	5	1	2	5	4	4	2.65625	0	31.1562	3.46181
91	11	2	1	5	144	32.2	15.5285	2	1.5	4	1	1	5	1	2	3	2.8125	0	21.3125	2.36806
92	11	2	1	5	135	28	15.3635	2	1.5	5	4	2	2	1	2	3	3.4375	0	23.9375	2.65972
93	11	2	1	5	141	37	18.6107	2	2	5	5	5	5	5	5	5	5.83333	0	42.8333	4.75926
94	11	2	1	5	151	40	17.5431	2	1.5	5	5	5	5	5	4	3	3.28125	0	36.7812	4.08681
95	11	2	1	5	135	35	19.2044	2	1.5	3	3	4	4	4	3	3	4.58333	0	30.0833	3.34259
96	11	2	1	5	140	59	30.102	2	1	5	1	1	1	1	1	1	4.0625	0	16.0625	1.78472
97	11	2	1	5	150	40	17.7778	2	2	5	5	4	2	4	4	3	3.28125	0	32.2812	3.58681
98	11	2	1	5	144	37	17.8434	2	1	5	3	1	3	1	3	3	4.0625	0	24.0625	2.67361
99	11	2	1	5	131	29	16.8988	2	1	5	2	1	3	2	2	2	2.1875	0	20.1875	2.24306
100	11	2	1	5	141	35	17.6047	2	1	4	3	1	3	2	2	3	2.65625	0	21.6562	2.40625
101	11	2	1	5	140	35	17.8571	2	1.5	3	1	2	3	2	2	2	2.03125	0	18.5312	2.05903
102	11	2	1	5	135	28	15.3635	2	1	5	3	1	2	2	1	2	2.34375	0	19.3438	2.14931
103	11	2	1	5	146	70	32.8392	2	0.5	2	2	1	1	1	1	2	1.25	0	11.75	1.30556
104	11	2	1	5	130	40	23.6686	2	1	3	3	1	2	2	2	3	2.8125	0	19.8125	2.20139
105	11	2	1	5	150	36	16	2	1.5	3	3	4	2	1	3	1	2.96875	0	21.4688	2.38542
106	11	2	1	5	143	53	25.9181	2	1	3	1	1	1	1	1	2	1.875	0	12.875	1.43056
107	11	2	1	5	139	35	18.115	2	1	5	3	1	3	3	2	2	2.65625	0	22.6562	2.51736
108	11	2	1	5	144	34	16.3966	2	1.5	5	3	1	2	2	2	3	2.96875	0	22.4688	2.49653
109	11	2	1	5	149	60	27.0258	2	1	3	1	1	2	1	1	1	3.125	0	14.125	1.56944
110	11	2	1	5	140	53	27.0408	2	1.5	4	4	4	2	3	3	3	2.34375	0	26.8438	2.98264
111	11	2	1	5	142	30	14.878	2	1	5	3	1	2	1	2	3	2.65625	0	20.6562	2.29514
112	11	2	1	5	134	30	16.7075	2	1.5	5	2	1	2	3	1	3	2.03125	0	20.5312	2.28125
113	11	2	1	5	138	40	21.004	2	1.5	4	4	4	3	3	3	3	2.96875	0	28.4688	3.16319
114	11	2	1	5	143	30	14.6706	2	2	2	3	3	3	3	3	2	2.8125	0	23.8125	2.64583
115	11	2	1	5	152	60	25.9695	2	1.5	5	1	1	1	1	1	1	1.25	0	13.75	1.52778
116	11	2	1	4	145	30	14.2687	2	1.5	3	3	3	3	2	2	2	2.65625	0	22.1562	2.46181
117	10	2	1	4	138	43	22.5793	2	1.5	5	3	1	3	2	1	2	2.65625	0	21.1562	2.35069
118	11	2	1	4	138	43	22.5793	2	1.5	5	3	1	3	3	3	3	2.65625	0	25.1562	2.79514
119	11	2	1	5	137	27.6	14.7051	2	1.5	3	1	2	3	3	1	2	2.1875	0	18.6875	2.07639
120	11	2	1	5	135	33	18.107	2	1.5	3	4	4	3	3	3	3	2.96875	0	27.4688	3.05208
121	11	2	1	5	137	43	29	1	2	5	1	1	3	2	2	3	2.8125	0	21.8125	2.42361
122	11	2	1	4	133	39	22.0476	2	2	5	3	2	2	2	3	1	1.875	0	21.875	2.43056
123	11	2	1	4	138	32.5	17.0657	2	2.5	5	4	3	4	4	4	1	1.5625	0	29.0625	3.22917
124	11	2	1	5	143	59.8	29.2435	2	2	3	2	1	2	2	2	3	2.8125	0	19.8125	2.20139
125	11	2	1	5	147	53.9	24.9433	2	1	3	1	1	1	1	2	2	1.40625	0	13.4062	1.48958
126	11	2	1	5	136	32	17.301	2	1	4	1	1	1	3	2	2	1.5625	0	16.5625	1.84028
127	11	2	1	5	130	29	17.1598	2	1.5	3	5	1	2	1	3	2	1.5625	0	20.0625	2.22917
128	11	2	1	5	136	40.4	21.8426	2	1	3	2	1	1	2	1	1	0.625	0	12.625	1.40278
129	11	2	1	5	125	31.2	19.968	2	2	5	1	4	1	2	3	2	3.75	0	23.75	2.63889
130	11	2	1	5	141	36.9	18.5604	2	1.5	3	1	4	3	1	4	3	1.71875	0	22.2188	2.46875
131	11	2	1	5	141.5	32.5	16.2319	2	1.5	5	4	1	2	2	3	3	1.71875	0	23.2188	2.57986
132	12	3	2	6	155	48	19.9792	2	2.5	3	3	1	3	3	4	3	3.92857	0	26.4286	2.93651
133	12	3	2	6	152	43	18.6115	2	2.5	5	1	2	3	2	3	3	4.375	0	25.875	2.875
134	12	3	2	6	145	43	20.4518	2	2	3	4	4	4	3	3	4	4.21875	0	31.2188	3.46875
135	12	3	2	6	143	42	20.5389	2	2	4	5	1	4	1	2	2	3.4375	0	24.4375	2.71528
136	12	3	2	6	140	33	16.8367	2	2	4	3	1	2	4	3	2	3.28125	0	24.2812	2.69792
137	12	3	2	6	140	30	15.3061	2	1	4	5	1	4	2	2	3	2.34375	0	24.3438	2.70486
138	12	3	2	6	135	29	15.9122	2	1.5	3	1	2	3	4	2	2	4.21875	0	22.7188	2.52431
139	12	3	2	6	152	60	25.9695	2	1.5	3	2	5	2	4	2	3	4.0625	0	26.5625	2.95139
140	12	3	2	6	154	41	17.2879	2	1.5	3	5	1	2	2	2	1	3.4375	0	20.9375	2.32639
141	12	3	2	6	134	32	17.8213	2	2.5	3	4	4	4	3	3	3	3.4375	0	29.9375	3.32639
142	12	3	2	6	158	51	20.4294	2	2.5	3	5	1	3	3	4	3	3.75	0	28.25	3.13889
143	12	3	2	6	159	47	18.591	2	1.5	4	3	1	3	4	4	2	3.125	0	25.625	2.84722
144	12	3	2	6	160	50	19.5312	2	2.5	4	4	1	3	3	3	2	3.4375	0	25.9375	2.88194
145	12	3	2	6	146	40	18.7652	2	2.5	3	1	4	5	3	3	2	3.75	0	27.25	3.02778
146	13	3	2	6	163	82	30.863	2	2.5	5	5	1	4	4	5	1	2.96875	0	30.4688	3.38542
147	12	3	2	6	137	50.7	27.0126	2	1.5	4	5	1	3	2	2	1	3.28125	0	22.7812	2.53125
148	11	2	2	6	147	36	16.6597	2	2.5	5	2	2	5	5	5	2	4.0625	0	32.5625	3.61806
149	11	2	2	6	136	40	21.6263	2	1.5	3	4	3	3	3	2	3	2.65625	0	25.1562	2.79514
150	11	2	2	5	152	48	20.7756	2	2.5	5	4	4	3	5	5	2	2.8125	0	33.3125	3.70139
151	10	2	2	5	142	30.4	15.0764	2	2.5	3	2	1	1	1	5	3	2.5	0	21	2.33333
152	11	2	2	5	133	35.4	20.0124	2	2.5	4	5	4	4	5	5	3	3.28125	0	35.7812	3.97569
153	11	2	2	5	134	36	20.049	2	1	5	5	3	2	3	4	3	2.8125	0	28.8125	3.20139
154	11	2	2	5	140	31	15.8163	2	1.5	3	4	4	5	3	4	2	3.125	0	29.625	3.29167
155	10	2	2	5	130	31	18.3432	2	2	1	5	1	5	4	4	2	3.75	0	27.75	3.08333
156	11	2	2	5	149	48	21.6206	2	2	1	2	2	2	1	3	5	5.15625	0	23.1562	2.57292
157	11	2	2	5	140	35	17.8571	2	0.5	3	1	1	1	2	2	1	2.96875	0	14.4688	1.60764
158	11	2	2	5	149	39	17.5668	2	2	4	2	1	2	3	3	3	3.28125	0	23.2812	2.58681
159	11	2	2	6	152	50	21.6413	2	2.5	4	5	2	3	4	2	4	3.90625	0	30.4062	3.37847
160	12	3	2	6	151	58	25.4375	2	2	5	2	2	2	2	2	2	2.5	0	21.5	2.38889
161	11	2	2	6	141	40	20.1197	2	1.5	4	1	2	3	3	1	3	3.90625	0	22.4062	2.48958
162	11	2	2	6	133	27.5	15.5464	2	1.5	4	2	2	2	3	3	1	2.1875	0	20.6875	2.29861
163	12	3	2	6	143	47	22.984	2	1	3	5	5	3	3	4	2	4.6875	0	30.6875	3.40972
164	12	3	2	6	163	66	24.841	2	2	5	4	5	4	5	5	3	3.75	0	36.75	4.08333
165	11	2	2	6	154	33	13.9147	2	2	3	3	3	3	5	3	3	4.53125	0	29.5312	3.28125
166	12	3	2	6	156	49	20.1348	2	2	4	5	1	4	4	4	3	3.125	0	30.125	3.34722
167	12	3	2	6	143	32	15.6487	2	2	5	5	5	5	4	5	5	4.84375	0	40.8438	4.53819
168	12	3	2	6	145	50	30.1	2	2.5	4	1	1	3	4	5	4	2.96875	0	27.4688	3.05208
169	12	3	2	6	138	42	22.0542	1	2.5	4	1	5	3	2	2	2	3.75	0	25.25	2.80556
170	12	3	2	6	147	54	24.9896	2	2.5	4	5	1	3	2	3	3	3.4375	0	26.9375	2.99306
171	12	3	2	6	149	36	16.2155	2	1.5	3	3	1	4	3	3	3	2.65625	0	24.1562	2.68403
172	11	2	2	6	145	41	19.5006	2	2.5	3	5	4	2	3	2	3	3.90625	0	28.4062	3.15625
173	12	3	2	6	150	49	21.7778	2	2	3	3	1	1	1	1	1	3.59375	0	16.5938	1.84375
174	12	3	2	6	132	43	24.6786	2	2	4	5	4	5	5	5	5	4.0625	0	39.0625	4.34028
175	11	2	2	5	148	48	21.9138	2	2.5	3	2	3	5	2	3	2	4.21875	0	26.7188	2.96875
176	12	3	2	5	146	41	19.2344	1	2	4	5	2	4	3	4	3	3.90625	0	30.9062	3.43403
177	11	2	2	5	144	31	14.9498	2	2	5	4	4	5	4	3	4	4.0625	0	35.0625	3.89583
178	11	2	2	5	145	49	23.3056	2	2.5	5	5	4	5	4	4	1	3.4375	0	33.9375	3.77083
179	11	2	2	5	140	28	14.2857	2	2.5	3	4	2	5	5	4	1	3.125	0	29.625	3.29167
180	11	2	2	5	148	35	15.9788	2	2	5	4	1	4	3	4	5	4.53125	0	32.5312	3.61458
181	11	2	2	5	152	53	22.9398	2	2.5	4	1	3	2	5	1	2	2.96875	0	23.4688	2.60764
182	11	2	2	5	152	50	21.6413	2	2.5	3	3	3	3	3	2	1	3.125	0	23.625	2.625
183	11	2	2	5	135	34	18.6557	2	2.5	4	4	2	4	3	4	3	3.4375	0	29.9375	3.32639
184	11	2	2	5	132	24	13.7741	2	2.5	3	3	3	2	3	3	5	2.5	0	27	3
185	10	2	2	5	142	51	25.2926	2	2.5	2	3	4	1	3	2	3	2.96875	0	23.4688	2.60764
186	10	2	2	5	132	37	21.2351	2	2	5	1	3	3	3	2	3	3.59375	0	25.5938	2.84375
187	11	2	2	5	133	26.5	14.9811	2	2.5	4	3	4	5	5	4	4	4.0625	0	35.5625	3.95139
188	11	2	2	5	128	23	14.0381	2	2.5	3	4	3	2	3	2	2	3.28125	0	24.7812	2.75347
189	11	2	2	5	135	24	13.1687	2	2.5	3	4	1	2	2	2	1	2.5	0	20	2.22222
190	11	2	2	5	135	34	18.6557	2	2.5	5	1	1	4	5	5	1	4.21875	0	28.7188	3.19097
191	12	3	2	5	148	37	16.8919	1	2.5	5	5	2	5	2	3	1	2.8125	0	28.3125	3.14583
192	12	3	2	5	143	60	29.3413	2	2.5	4	2	1	2	3	2	2	2.65625	0	21.1562	2.35069
193	11	2	2	5	157	57	23.1247	2	1.5	3	1	1	2	2	2	2	2.8125	0	17.3125	1.92361
194	10	2	2	5	143	39	19.0718	2	2.5	4	4	1	5	4	4	5	4.375	0	33.875	3.76389
195	11	2	2	5	140	34	17.3469	2	1	1	1	4	2	2	2	2	2.8125	0	17.8125	1.97917
196	10	2	2	5	141	28	29	1	2.5	5	4	2	5	5	4	5	2.1875	0	34.6875	3.85417
197	10	2	2	5	139	29	15.0096	2	2	4	4	1	3	2	3	3	2.8125	0	24.8125	2.75694
198	10	2	2	5	123	22	14.5416	2	2.5	3	4	5	2	2	2	1	2.8125	0	24.3125	2.70139
199	11	2	2	5	149	41	18.4676	2	1.5	3	3	4	4	3	5	3	3.59375	0	30.0938	3.34375
200	12	3	2	6	146	45	21.1109	2	2.5	5	4	3	3	2	3	2	4.0625	0	28.5625	3.17361
201	12	3	2	6	146	62	29.0861	2	2.5	5	4	3	3	2	3	2	3.59375	0	28.0938	3.12153
202	9	1	2	4	130	26	15.3846	2	2.5	3	1	1	2	5	3	4	4.6875	0	26.1875	2.90972
203	9	1	2	4	136	45	24.3296	2	2.5	1	2	4	4	5	3	4	4.6875	0	30.1875	3.35417
204	9	1	2	4	154	39	16.4446	2	2	3	5	3	4	3	3	3	4.0625	0	30.0625	3.34028
205	9	1	2	4	127	23	14.26	2	2.5	3	1	5	5	2	3	5	3.28125	0	29.7812	3.30903
206	9	1	2	4	125	26.5	16.96	2	2.5	5	5	1	3	3	3	5	5	0	32.5	3.61111
207	9	1	2	4	126	26.3	16.5659	2	2	3	3	5	2	3	2	1	3.125	0	24.125	2.68056
208	9	1	2	4	128	33.5	20.4468	2	2	3	1	3	5	3	3	2	2.96875	0	24.9688	2.77431
209	9	1	2	4	144	35	16.8789	2	2.5	3	1	1	3	4	2	2	2.34375	0	20.8438	2.31597
210	9	1	2	4	126	24.5	15.4321	2	2.5	3	3	2	4	4	3	1	3.125	0	25.625	2.84722
211	9	1	2	4	134	28	15.5937	2	2	3	1	2	1	1	1	1	2.65625	0	14.6562	1.62847
212	9	1	2	4	134	26	14.4798	2	2.5	3	4	1	3	3	3	1	3.28125	0	23.7812	2.64236
213	9	1	2	4	130	33	19.5266	1	2.5	4	1	4	3	4	5	2	3.28125	0	28.7812	3.19792
214	8	1	2	2	132	39	22.3829	2	1.5	3	3	3	2	2	4	2	2.34375	0	22.8438	2.53819
215	8	1	2	2	118	19	13.6455	2	2	3	3	1	4	3	3	3	2.5	0	24.5	2.72222
216	9	1	2	2	117	22.5	16.4366	2	1.5	3	3	3	2	2	4	3	2.5	0	24	2.66667
217	8	1	2	2	120	24	16.6667	2	1.5	3	3	1	1	2	4	3	2.5	0	21	2.33333
218	8	1	2	2	118	20	14.3637	2	1.5	3	1	1	1	1	3	2	2.1875	0	15.6875	1.74306
219	10	2	2	4	137	36	19.1806	2	1.5	3	3	3	3	3	4	4	2.65625	0	27.1562	3.01736
220	10	2	2	4	128	29	17.7002	2	1.5	3	3	3	2	2	2	4	2.5	0	23	2.55556
221	9	1	2	2	130	39	23.0769	2	2	3	3	1	2	2	2	2	2.1875	0	19.1875	2.13194
222	10	2	2	4	131	30	17.4815	2	1.5	3	3	3	1	1	2	3	2.34375	0	19.8438	2.20486
223	10	2	2	4	131	30	17.4815	2	1.5	3	3	3	1	3	2	2	2.65625	0	21.1562	2.35069
224	10	2	2	4	140	30	15.3061	2	2	3	3	1	4	2	2	3	2.34375	0	22.3438	2.48264
225	10	2	2	4	127	23.5	14.57	2	1.5	3	3	3	1	1	3	1	2.03125	0	18.5312	2.05903
226	10	2	2	4	130	26.5	15.6805	2	1.5	3	1	1	1	1	3	3	2.34375	0	16.8438	1.87153
227	10	2	2	4	137	25	13.3198	2	1.5	3	1	1	1	1	1	1	2.03125	0	12.5312	1.39236
228	10	2	2	4	135	42.5	23.3196	2	1	3	3	3	1	1	1	1	2.03125	0	16.0312	1.78125
229	8	1	2	2	120	23	15.9722	2	1.5	3	3	4	1	1	4	2	2.34375	0	21.8438	2.42708
230	10	2	2	3	140	42	21.4286	2	1.5	3	3	1	2	1	2	1	2.03125	0	16.5312	1.83681
231	8	1	2	2	131	27	15.7333	2	1.5	3	3	3	1	1	4	2	2.03125	0	20.5312	2.28125
232	12	3	2	6	149	74	33.3318	2	2.5	3	4	4	4	5	5	4	3.90625	0	35.4062	3.93403
233	12	3	2	6	149	38.7	17.4316	2	2	5	4	4	3	3	4	3	4.21875	0	32.2188	3.57986
234	12	3	2	6	152	54.5	23.589	2	1	4	3	1	3	2	2	2	1.71875	0	19.7188	2.19097
235	12	3	2	6	142	30.7	15.2252	2	2	4	4	2	2	2	2	2	2.5	0	22.5	2.5
236	13	3	2	6	152	67.9	29.3889	2	2.5	3	5	2	4	4	5	5	4.0625	0	34.5625	3.84028
237	13	3	2	6	157	78	31.6443	2	2.5	3	1	2	4	4	1	5	3.4375	0	25.9375	2.88194
238	12	3	2	6	154	44.5	18.7637	2	2	3	3	2	3	3	4	1	2.96875	0	23.9688	2.66319
239	12	3	2	6	140	33	16.8367	2	2.5	3	2	1	4	2	1	1	3.75	0	20.25	2.25
240	12	3	2	6	145	39	18.5493	2	1.5	4	3	1	4	5	2	3	2.65625	0	26.1562	2.90625
241	9	1	2	3	130	28	16.568	2	1.5	3	4	1	1	1	3	3	2.65625	0	20.1562	2.23958
242	9	1	2	3	127	23	14.26	2	2.5	3	4	1	1	4	2	2	3.59375	0	23.0938	2.56597
243	9	1	2	3	127	22.5	13.95	2	2.5	3	5	2	3	2	3	2	2.1875	0	24.6875	2.74306
244	9	1	2	3	132	31	17.7916	2	2	2	3	3	2	3	2	2	2.34375	0	21.3438	2.37153
245	9	1	2	3	137	39	20.7789	2	2	3	2	1	3	2	1	3	2.34375	0	19.3438	2.14931
246	9	1	2	3	119	20	14.1233	2	1.5	3	3	3	1	1	2	1	1.5625	0	17.0625	1.89583
247	9	1	2	4	132	24	13.7741	2	2	3	2	1	1	1	2	2	2.03125	0	16.0312	1.78125
248	10	2	2	3	138	43.5	22.8418	2	2	3	1	1	1	1	4	3	1.71875	0	17.7188	1.96875
249	10	2	2	3	127	38	23.56	2	2	3	3	3	4	1	4	3	1.71875	0	24.7188	2.74653
250	10	2	2	3	127	28	17.36	2	2.5	3	3	3	3	1	2	4	2.1875	0	23.6875	2.63194
251	9	1	2	3	138	64	33.6064	2	2	3	1	3	2	2	3	2	2.03125	0	20.0312	2.22569
252	9	1	2	3	124	27	17.5598	2	1.5	3	4	1	3	1	5	2	2.65625	0	23.1562	2.57292
253	9	1	2	3	126	21	13.2275	2	2	3	3	3	1	2	3	1	2.5	0	20.5	2.27778
254	9	1	2	3	132	36	20.6612	2	2	3	4	1	3	2	3	4	2.5	0	24.5	2.72222
255	10	2	2	3	126	20	12.5976	2	2	3	3	3	1	1	2	2	2.65625	0	19.6562	2.18403
256	9	1	2	3	129	24	14.4222	2	1.5	3	3	3	1	1	4	3	2.5	0	22	2.44444
257	10	2	2	3	141	38	19.1137	2	1.5	3	3	1	1	1	4	2	2.34375	0	18.8438	2.09375
258	10	2	2	3	143	32	15.6487	2	1.5	3	3	1	2	1	2	1	1.875	0	16.375	1.81944
259	9	1	2	3	136	44	23.7889	2	1.5	3	3	3	1	1	3	1	1.71875	0	18.2188	2.02431
260	9	1	2	3	132	37	21.2351	2	1.5	3	3	1	1	1	2	1	1.875	0	15.375	1.70833
261	10	2	2	5	142	44	21.8211	2	1	1	3	1	2	3	3	2	3.90625	0	19.9062	2.21181
262	10	2	2	5	138	30	15.753	2	0.5	1	1	2	3	2	3	1	3.28125	0	16.7812	1.86458
263	10	2	2	5	143	42	20.5389	2	1	1	1	2	3	3	3	1	2.8125	0	17.8125	1.97917
264	11	2	2	5	145	37	17.5981	2	1	3	4	3	3	3	3	2	3.75	0	25.75	2.86111
265	11	2	2	5	143	36	17.6048	2	1	3	4	3	3	3	3	2	3.4375	0	25.4375	2.82639
266	10	2	2	5	140	32	16.3265	2	1.5	1	4	2	2	3	2	2	2.65625	0	20.1562	2.23958
267	11	2	2	5	149	49	22.0711	2	1	4	2	3	3	5	2	4	3.90625	0	27.9062	3.10069
268	10	2	2	5	140	45	22.9592	2	1	1	4	4	3	4	4	3	4.0625	0	28.0625	3.11806
269	11	2	2	5	147	47	21.7502	2	2.5	3	5	2	5	5	4	5	4.6875	0	36.1875	4.02083
270	11	2	2	5	138	41	21.5291	2	2.5	5	5	2	5	5	5	5	4.375	0	38.875	4.31944
271	10	2	2	5	128	27	16.4795	2	2	1	1	1	4	3	3	2	3.4375	0	20.4375	2.27083
272	11	2	2	5	145	40	19.025	2	2.5	5	1	5	4	5	5	5	5.15625	0	37.6562	4.18403
273	10	2	2	5	156	62	25.4767	2	2	1	1	4	5	4	4	5	3.75	0	29.75	3.30556
274	10	2	2	5	130	24	14.2012	2	1.5	1	3	2	1	2	2	1	2.65625	0	16.1562	1.79514
275	12	3	2	5	157	42	17.0392	2	2.5	1	5	3	1	2	4	1	2.34375	0	21.8438	2.42708
276	12	3	2	6	149	59	26.5754	2	2.5	1	5	1	3	4	3	2	2.03125	0	23.5312	2.61458
277	12	3	2	6	138	30	15.753	2	2.5	1	5	1	5	3	3	4	3.59375	0	28.0938	3.12153
278	12	3	2	6	153	54	23.0681	2	1.5	1	5	1	5	3	3	3	2.65625	0	25.1562	2.79514
279	12	3	1	6	141	32.4	16.297	2	1.5	5	5	5	1	1	4	2	3.59375	0	28.0938	3.12153
280	8	1	1	3	113	17.2	13.4701	2	1.75	2	2	1	3	1	3	2	3.125	0	18.875	2.09722
281	11	2	1	5	134.5	32	17.6891	2	1	5	4	4	2	1	3	2	2.8125	0	24.8125	2.75694
282	11	2	1	5	134	32.6	18.1555	2	1.5	5	5	1	1	3	2	2	3.59375	0	24.0938	2.67708
283	11	2	1	5	133	31.4	17.7511	2	1.5	5	1	1	4	3	2	3	4.375	0	24.875	2.76389
284	12	3	1	6	149	34	15.3146	2	1	5	1	1	1	1	1	1	1.875	0	13.875	1.54167
285	11	2	1	5	131	34.5	20.1037	2	2	5	4	4	3	1	4	4	3.4375	0	30.4375	3.38194
286	13	3	1	6	152.5	65	27.9495	1	2.5	4	5	5	1	3	2	2	4.53125	0	29.0312	3.22569
287	12	3	1	6	138.5	27.3	14.2319	2	1.5	5	1	1	3	2	2	1	2.34375	0	18.8438	2.09375
288	12	3	1	6	142.5	36.8	18.1225	2	1	2	3	1	1	3	3	3	2.8125	0	19.8125	2.20139
289	11	2	1	5	132.5	28	15.9487	2	1.5	4	4	3	1	1	3	2	2.96875	0	22.4688	2.49653
290	9	1	2	3	138	64	33.6064	2	2	3	1	3	2	2	3	2	2.03125	0	20.0312	2.22569
291	9	1	2	3	124	27	17.5598	2	1.5	3	4	1	3	1	5	2	2.65625	0	23.1562	2.57292
292	9	1	2	3	126	21	13.2275	2	2	3	3	3	1	2	3	1	2.5	0	20.5	2.27778
293	9	1	2	3	132	36	20.6612	2	2	3	4	1	3	2	3	4	2.5	0	24.5	2.72222
294	10	2	2	3	126	20	12.5976	2	2	3	3	3	1	1	2	2	2.65625	0	19.6562	2.18403
295	9	1	2	3	129	24	14.4222	2	1.5	3	3	3	1	1	4	3	2.5	0	22	2.44444
296	10	2	2	3	141	38	19.1137	2	1.5	3	3	1	1	1	4	2	2.34375	0	18.8438	2.09375
297	10	2	2	3	143	32	15.6487	2	1.5	3	3	1	2	1	2	1	1.875	0	16.375	1.81944
298	9	1	2	3	136	44	23.7889	2	1.5	3	3	3	1	1	3	1	1.71875	0	18.2188	2.02431
299	9	1	2	3	132	37	21.2351	2	1.5	3	3	1	1	1	2	1	1.875	0	15.375	1.70833
300	10	2	2	5	142	44	21.8211	2	1	1	3	1	2	3	3	2	3.90625	0	19.9062	2.21181
301	10	2	2	5	138	30	15.753	2	0.5	1	1	2	3	2	3	1	3.28125	0	16.7812	1.86458
302	10	2	2	5	143	42	20.5389	2	1	1	1	2	3	3	3	1	2.8125	0	17.8125	1.97917
303	11	2	2	5	145	37	17.5981	2	1	3	4	3	3	3	3	2	3.75	0	25.75	2.86111
304	9	1	2	3	137	39	20.7789	2	2	3	2	1	3	2	1	3	2.34375	0	19.3438	2.14931
305	9	1	2	3	119	20	14.1233	2	1.5	3	3	3	1	1	2	1	1.5625	0	17.0625	1.89583
306	9	1	2	4	132	24	13.7741	2	2	3	2	1	1	1	2	2	2.03125	0	16.0312	1.78125
307	10	2	2	3	138	43.5	22.8418	2	2	3	1	1	1	1	4	3	1.71875	0	17.7188	1.96875
308	10	2	2	3	127	38	23.56	2	2	3	3	3	4	1	4	3	1.71875	0	24.7188	2.74653
309	10	2	2	3	127	28	17.36	2	2.5	3	3	3	3	1	2	4	2.1875	0	23.6875	2.63194
310	12	3	1	5	143	43	21.0279	2	1	2	1	3	2	2	2	1	1.25	0	15.25	1.69444
311	8	1	1	3	114	21.2	16.3127	2	1.5	5	1	1	2	3	3	2	2.65625	0	21.1562	2.35069
312	8	1	1	3	119.5	20.4	14.2855	2	2	5	3	1	3	2	3	4	2.8125	0	25.8125	2.86806
313	8	1	1	2	124.5	27.1	17.4836	2	2	5	5	1	3	1	1	2	3.90625	0	23.9062	2.65625
314	8	1	1	2	141	27.8	13.9832	2	1.5	5	3	1	3	1	4	3	3.4375	0	24.9375	2.77083
315	8	1	1	2	125	26.2	16.768	1	2.5	5	5	1	3	4	3	3	2.65625	0	29.1562	3.23958
316	11	2	1	6	149.5	45.2	20.2235	2	1	2	1	2	1	5	1	2	2.5	0	17.5	1.94444
317	12	3	1	6	141	32.4	16.297	2	1.5	5	5	5	1	1	4	2	3.59375	0	28.0938	3.12153
318	8	1	1	3	113	17.2	13.4701	2	1.75	2	2	1	3	1	3	2	3.125	0	18.875	2.09722
319	11	2	1	5	134.5	32	17.6891	2	1	5	4	4	2	1	3	2	2.8125	0	24.8125	2.75694
320	11	2	1	5	134	32.6	18.1555	2	1.5	5	5	1	1	3	2	2	3.59375	0	24.0938	2.67708
321	11	2	1	5	133	31.4	17.7511	2	1.5	5	1	1	4	3	2	3	4.375	0	24.875	2.76389
322	12	3	1	6	149	34	15.3146	2	1	5	1	1	1	1	1	1	1.875	0	13.875	1.54167
323	11	2	1	5	131	34.5	20.1037	2	2	5	4	4	3	1	4	4	3.4375	0	30.4375	3.38194
324	10	2	2	5	128	27	16.4795	2	2	1	1	1	4	3	3	2	3.4375	0	20.4375	2.27083
325	11	2	2	5	145	40	19.025	2	2.5	5	1	5	4	5	5	5	5.15625	0	37.6562	4.18403
326	10	2	2	5	156	62	25.4767	2	2	1	1	4	5	4	4	5	3.75	0	29.75	3.30556
327	10	2	2	5	130	24	14.2012	2	1.5	1	3	2	1	2	2	1	2.65625	0	16.1562	1.79514
